# Supplementary material for: Ameliorated Performance of Sulfonated Poly(Arylene Ether Sulfone) Block Copolymers with Increased Hydrophilic Oligomer Ratio in Proton-Exchange Membrane Fuel Cells Operating at 80% Relative Humidity
Source: Polymers (Basel). 2020 Aug 20;12(9):1871. doi: 10.3390/polym12091871 (PMC7563133; doi:10.3390/polym12091871)
Supplement: Supplementary file 1 [file polymers-12-01871-s001.pdf]

## **Supporting Information**

### **Ameliorated performance of sulfonated poly(arylene ether sulfone) block copolymers with increased hydrophilic oligomer ratio in proton exchange membrane fuel cells operating at 80% relative humidity**

**Ae Rhan Kim <sup>1,2,\*</sup>, Mohanraj Vinothkannan <sup>3</sup>, Kyu Ha Lee <sup>1</sup>, Ji Young Chu <sup>1</sup>, Sumg Kwan Ryu <sup>2</sup>, Hwan Gyu Kim <sup>1</sup>, Jae-Young Lee <sup>4</sup>, Hong-Ki Lee <sup>4</sup> and Dong Jin Yoo <sup>1,2,3,\*\*</sup>**

<sup>1</sup> Department of Life Science, Jeonbuk National University, Jeonju, Jeollabuk-do, 54896, Republic of Korea

<sup>2</sup> Department of Energy Storage/Conversion Engineering of Graduate School, Hydrogen and Fuel Cell Research Center, Jeonbuk National University, Jeonju, Jeollabuk-do 54896, Republic of Korea

<sup>3</sup> R&D Education Center for Whole Life Cycle R&D of Fuel Cell Systems, Jeonbuk National University, Jeonju, Jeollabuk-do 54896, Republic of Korea

<sup>4</sup> Hydrogen Fuel Cell Center, Woosuk University, 151 Dusan-ri, Bongdong-eup, Wanju-gun, Jeollabuk-do, 55315, Republic of Korea

\* Correspondence: aerhankim@jbnu.ac.kr (A.R. Kim); djyoo@jbnu.ac.kr (D.J. Yoo)

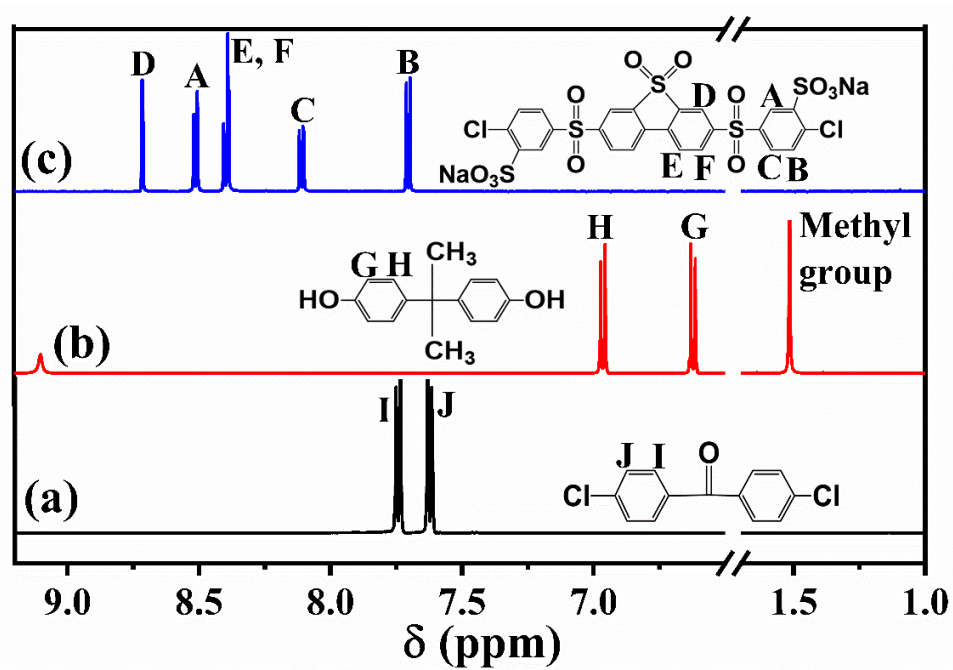

Figure S1.  $^1\text{H}$  NMR spectra of (a) DCBP, (b) BPA and (c) sBCPSBP. The monomers were dissolved in  $\text{DMSO-d}_6$  for  $^1\text{H}$  NMR analysis.

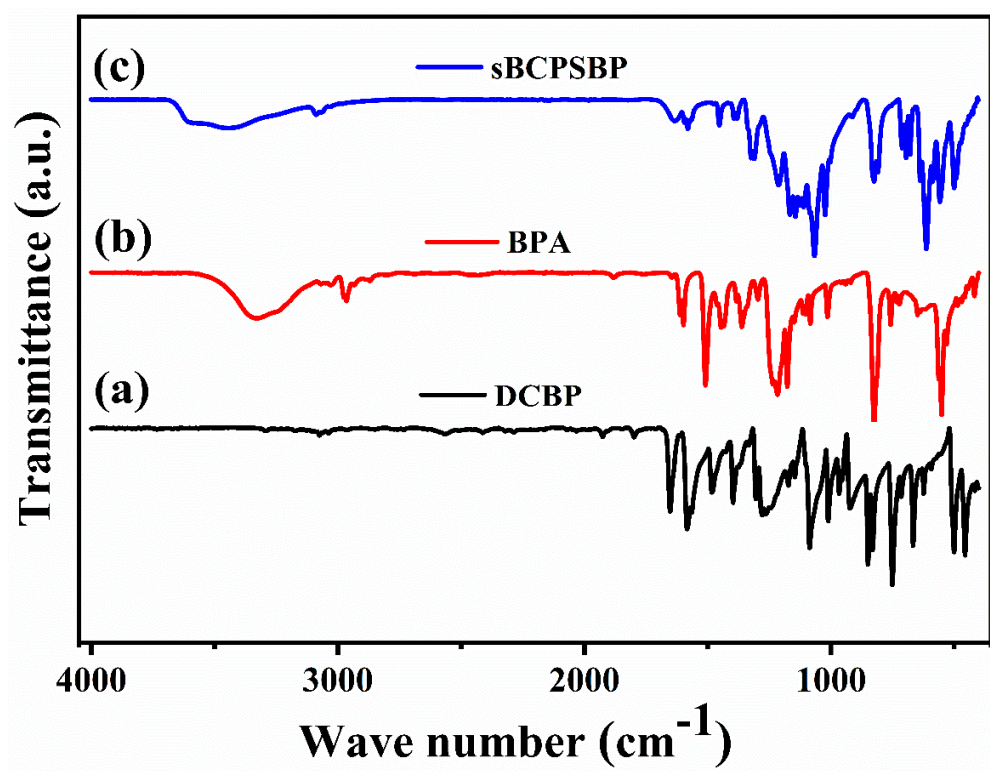

Figure S2. FT-IR spectra of (a) DCBP, (b) BPA and (c) sBCPSBP.
